# Supplementary material for: Chromosomal Evolution of the Talpinae
Source: Preprints.org preprint supplement (doi:10.20944/preprints202306.1428.v1), 2023-06-20
Supplement: Supplementary file 1 [file Table S2.docx]

| ***T.altaica*** | ***E.parvidens*** | ***M.imaizumi*** | ***U.talpoides*** |
| --- | --- | --- | --- |
| 1 | 9 | 14 | 1q |
| 2 | 1p+15 | 15+17 | 1p+8p |
| 3 | 6 | 1 | 2 |
| 4 | 3 | 11 | 3 |
| 5 | 5 | 5 | 5 |
| 6 | 2 | 8 | 14 |
| 7 | 14 | 10 | 4 |
| 8 | 7 | 13 | 7 |
| 9 | 4 | 12 | 6 |
| 10 | 8 | 2 | 8q+15 |
| 11 | 16+17 | 3 | 9 |
| 12 | 10 | 5 | 10 |
| 13 | 1q | 16 | 13 |
| 14 | 12 | 9 | 11 |
| 15 | 11 | 4 | 12 |
| 16 | 13 | 7 | 16 |

**Supplement. Table 2.** The chromosomes of the *Talpinae* species arranged according to the *T.altaica* chromosomes analyzed by chromosome painting
